# Supplementary material
Source: MDPI journal article supplement (https://www.mdpi.com/2073-4344/12/11/1370)
Supplement: s1 [file s1]

## SUPPLEMENTARY MATERIALS

# Environmentally Friendly Fabrication of High-Efficient Fe-ZnO/Citric Acid-Modified Cellulose Composite and the Enhancement of Photocatalytic Activity in the Presence of H<sub>2</sub>O<sub>2</sub>

Agnieszka Fiszka Borzyszkowska <sup>1,2,\*</sup>, Agnieszka Sulowska <sup>1</sup>, Ivar Zekker <sup>3</sup>, Jakub Karczewski <sup>4</sup>, Kai Bester <sup>5</sup> and Anna Zielińska-Jurek <sup>1,2,\*#</sup>

<sup>1</sup> Department of Processing Engineering and Chemical Technology, Gdansk University of Technology, Gabriela Narutowicza 11/12, 80-233 Gdansk, Poland

<sup>2</sup> EcoTech Center, Gdańsk University of Technology, G. Narutowicza 11/12, 80-233 Gdansk, Poland

<sup>3</sup> Institute of Chemistry, University of Tartu, 14a Ravila St., 50411 Tartu, Estonia

<sup>4</sup> Institute of Nanotechnology and Materials Engineering, Faculty of Applied Physics and Mathematics, Gdańsk University of Technology, Gabriela Narutowicza 11/12, 80-233 Gdansk, Poland

<sup>5</sup> Environmental Science, Århus University, Frederiksborgsvej 399, 4000 Roskilde, Denmark

\* Correspondence: agnieszka.borzyszkowska@pg.edu.pl (A.F.B.); annjurek@pg.edu.pl (A.Z.-J.)

**Abstract:** In the present study, a novel Fe-ZnO/citric acid-modified cellulose composite

**Table S1.** Examples of a current study of the photocatalytic IBU in degradation in the presence of different materials.

| No. | Photocatalyst                                                               | Type of Light Used                                                                                | Condition Set                                                                                                                               |                              |               | Degradation                                                           | Ref. |
|-----|-----------------------------------------------------------------------------|---------------------------------------------------------------------------------------------------|---------------------------------------------------------------------------------------------------------------------------------------------|------------------------------|---------------|-----------------------------------------------------------------------|------|
|     |                                                                             |                                                                                                   | Catalyst Loading                                                                                                                            | Initial Concentration        | Reaction Time |                                                                       |      |
| 1.  | TiO <sub>2</sub> Degussa P25                                                | 10 W UV high intensity LEDs                                                                       | 0.5, 1.0 or 1.5 g · dm <sup>-3</sup>                                                                                                        | 60 mg · dm <sup>-3</sup>     | 90 min        | 100% (for 0.5 g · dm <sup>-3</sup> catalyst loading)                  | [41] |
| 2.  | Commercial TiO <sub>2</sub> solid (Vetec, average particle size of 100 nm). | mercury lamp (125 W)                                                                              | 0.1, 0.3, and 0.5 g · dm <sup>-3</sup>                                                                                                      | 10 <sup>-4</sup> M           | 120 min       | 100% after 10 minutes (for 0.5 g · dm <sup>-3</sup> catalyst loading) | [42] |
| 3.  | ZnO-Ce                                                                      | mercury lamp (125 W)                                                                              | 0.5, 1.0, and 1.5 g · dm <sup>-3</sup>                                                                                                      | 20 mg · dm <sup>-3</sup>     | 120 min       | 60% (for 0.5 g · dm <sup>-3</sup> catalyst loading)                   | [43] |
| 4.  | ZnO                                                                         | 125 W medium pressure Hg vapor lamp (UV-C)                                                        | 0.5 g · dm <sup>-3</sup>                                                                                                                    | 1.5-13 mg · dm <sup>-3</sup> | 100min        | 80% at 10 mg · dm <sup>-3</sup> initial concentration                 | [40] |
| 5.  | BiOCl (99.8%; Alfa Aesar)                                                   | Rayonet-RPR 100 UV Photoreactor equipped with four 254-nm 128 W · m <sup>-1</sup> two-prong bulbs | 0.25 g · dm <sup>-3</sup>                                                                                                                   | 20 mg · dm <sup>-3</sup>     | 120 min       | 20 min                                                                | [44] |
| 6.  | α-Fe <sub>2</sub> O <sub>3</sub> /rGO                                       | white LED                                                                                         | 5 g · dm <sup>-3</sup>                                                                                                                      | 5 mg · dm <sup>-3</sup>      | 140 min       | 100%                                                                  | [45] |
| 7.  | PVDF- ZnO/Ag <sub>2</sub> CO <sub>3</sub> /Ag <sub>2</sub> O membrane       | (LED) lamp, λ = 420 nm, 100 W                                                                     | Ultrafiltration by ZnO/Ag <sub>2</sub> CO <sub>3</sub> /Ag <sub>2</sub> O nanocomposite incorporated the poly (vinylidene fluoride)membrane | 20 mg · dm <sup>-3</sup>     | 60 min        | 35.3%                                                                 | [46] |

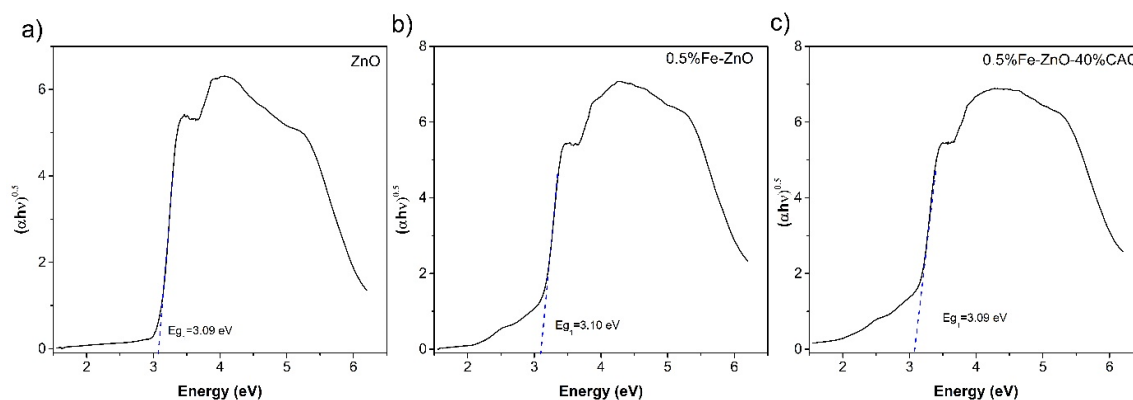

**Figure S1.** Tauc plot of (a) ZnO, (b) 0.5%Fe-ZnO and (c) 0.5%Fe-ZnO-40%CAC.

**Table S2.** Electrical energy per order for IBU degradation in the presence of selected photocatalysts during photocatalytic process and supported with H<sub>2</sub>O<sub>2</sub>.

| Photocatalyst     | EE/O<br>for Photocatalysis<br>(Wh · dm <sup>-3</sup> /Order) | EE/O<br>for Photocatalysis+H <sub>2</sub> O <sub>2</sub><br>(Wh · dm <sup>-3</sup> /Order) |
|-------------------|--------------------------------------------------------------|--------------------------------------------------------------------------------------------|
| ZnO               | 0.564                                                        | 0.581                                                                                      |
| 0.5%Fe-ZnO        | 0.541                                                        | 0.387                                                                                      |
| ZnO-40%CAC        | 0.567                                                        | 0.448                                                                                      |
| 0.5%Fe-ZnO-40%CAC | 0.429                                                        | 0.220                                                                                      |

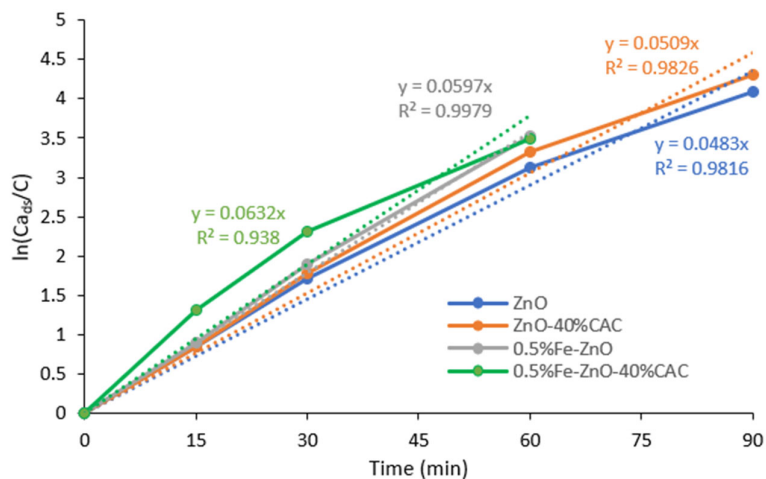

**Figure S2.** Trend of first-order linearized equation used for the calculation of kinetic parameters of selected photocatalytic processes.

## References

40. Rastkari, N.; Eslami, A.; Nasser, S.; Piroti, E.; Asadi, A. Optimizing parameters on nanophotocatalytic degradation of ibuprofen using UVC/ZnO processes by response surface methodology. *Pol. J. Environ. Stud.* **2017**, *26*, 785–794. <https://doi.org/10.15244/pjoes/64931>.
41. Jallouli, N.; Pastrana-Martínez, L.M.; Ribeiro, A.R.; Moreira, N.F.F.; Faria, J.L.; Hentati, O.; Silva, A.M.T.; Ksibi, M. Heterogeneous photocatalytic degradation of ibuprofen in ultrapure water, municipal and pharmaceutical industry wastewaters using a TiO<sub>2</sub>/UV-LED system. *Chem. Eng. J.* **2018**, *334*, 976–984. <https://doi.org/10.1016/j.cej.2017.10.045>.
42. Miranda, M.O.; Cabral Cavalcanti, W.E.; Barbosa, F.F.; Antonio De Sousa, J.; Ivan Da Silva, F.; Pergher, S.B.C.; Braga, T.P. Photocatalytic degradation of ibuprofen using titanium oxide: Insights into the mechanism and preferential attack of radicals. *RSC Adv.* **2021**, *11*, 27720–27733. <https://doi.org/10.1039/d1ra04340d>.
43. Sá, A.S.; Feitosa, R.P.; Honório, L.; Peña-García, R.; Almeida, L.C.; Dias, J.S.; Brazuna, L.P.; Tabuti, T.G.; Triboni, E.R.; Osajima, J.A.; et al. A brief photocatalytic study of zno containing cerium towards ibuprofen degradation. *Materials* **2021**, *14*, 5891. <https://doi.org/10.3390/ma14195891>.
44. Arthur, R.B.; Bonin, J.L.; Ardill, L.P.; Rourke, E.J.; Patterson, H.H.; Stemmler, E.A. Photocatalytic degradation of ibuprofen over BiOCl nanosheets with identification of intermediates. *J. Hazard. Mater.* **2018**, *358*, 1–9. <https://doi.org/10.1016/j.jhazmat.2018.06.018>.
45. Shibu, M.C.; Benoy, M.D.; Shanavas, S.; Haija, M.A.; Duraimurugan, J.; Kumar, G.S.; Ahamad, T.; Maadeswaran, P.; Van Le, Q. White LED active  $\alpha$ -Fe<sub>2</sub>O<sub>3</sub>/rGO photocatalytic nanocomposite for an effective degradation of tetracycline and ibuprofen molecules. *Environ. Res.* **2022**, *212*, 113301. <https://doi.org/10.1016/j.envres.2022.113301>.
46. Rosman, N.; Norharyati Wan Salleh, W.; Aqilah Mohd Razali, N.; Nurain Ahmad, S.Z.; Hafiza Ismail, N.; Aziz, F.; Harun, Z.; Fauzi Ismail, A.; Yusof, N. Ibuprofen removal through photocatalytic filtration using antifouling PVDF-ZnO/Ag<sub>2</sub>CO<sub>3</sub>/Ag<sub>2</sub>O nanocomposite membrane. *Mater. Today Proc.* **2019**, *42*, 69–74. <https://doi.org/10.1016/j.matpr.2020.09.476>.
